# Supplementary material
Source: PubMed Central journal article supplement (PMC7434434)
Supplement: mmc1.pdf [file mmc1.pdf]

# THE LANCET Microbe

## Supplementary appendix

This appendix formed part of the original submission. We post it as supplied by the authors.

Supplement to: Tessema S K, Inzaule S C, Christoffels A, et al. Accelerating genomics-based surveillance for COVID-19 response in Africa. *Lancet Microbe* 2020; published online August 18. [https://doi.org/10.1016/S2666-5247\(20\)30117-8](https://doi.org/10.1016/S2666-5247(20)30117-8).

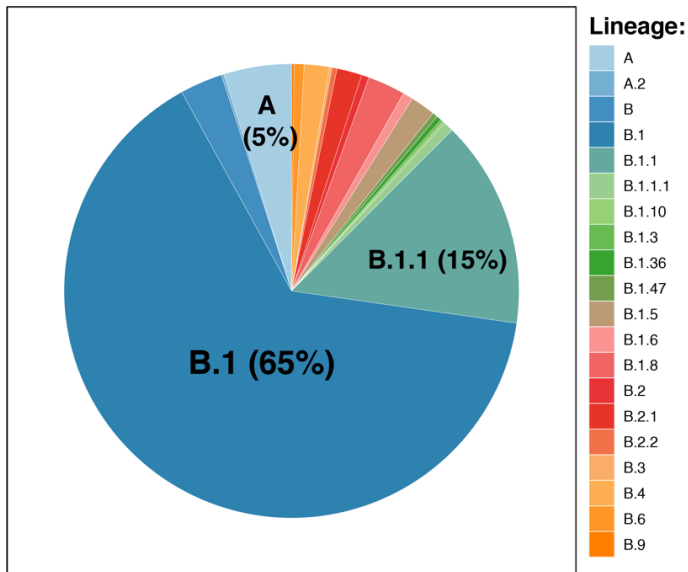

**Figure:** Proportions of 20 SARS-CoV-2 global lineages circulating in 12 countries in Africa. The lineages were assigned from 561 high quality sequences using the Pangolin toolkit (v1.1.14, updated on 2020-05-19), as the proposed dynamic nomenclature by Rambaut *et al* 2020<sup>10</sup>. Data taken from [www.gisaid.org](http://www.gisaid.org) on 19-June-2020.
